# Supplementary material for: Exclusive Enteral Nutrition Initiates Individual Protective Microbiome Changes to Induce Remission in Pediatric Crohn’s Disease
Source: bioRxiv or medRxiv preprint supplement (doi:10.1101/2023.12.21.23300351), 2024-09-16
Supplement: Supplementary file [file media-1.pdf]

A

Fiber Rich (FR)  
medium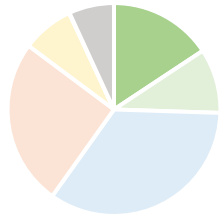

- Fiber (Inulin, Xylan, Pectin, Arabinogalactan, Guar Gum)
- Starch
- N-Compounds
- salts
- Mucin
- Vitamins
- Emulsifyer, Anti-foam

B EEN-like medium

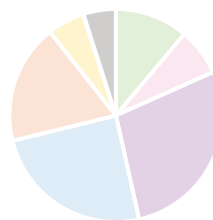

- Starch
- Carbohydrates/ Sugar
- Modulen IBD
- N-Compounds
- salts
- Mucin
- Vitamins
- Emulsifyer, Anti-foam

C

|                                            | Component                             | g/L FR (MacFarlane et al. 1998) | g/L EEN-like |
|--------------------------------------------|---------------------------------------|---------------------------------|--------------|
| Fiber                                      | Pectin (from citrus)                  | 2                               |              |
|                                            | Guar gum                              | 1                               |              |
|                                            | Xylan (from oat spelt)                | 2                               |              |
|                                            | Inulin (from <i>Dahlia</i> tubers)    | 1                               |              |
|                                            | Arabinogalactan (larch wood)          | 2                               |              |
| Starch                                     | Starch (wheat)                        | 5                               |              |
|                                            | Starch (rice)                         |                                 | 7.9          |
| Carbohydrates/ Sugar                       | Sucrose                               |                                 | 1.3          |
|                                            | Glucose                               |                                 | 3.6          |
|                                            | Fructose                              |                                 | 0.2          |
| Modulen IBD ®                              | Modulen IBD                           |                                 | 20           |
| N-Compunds                                 | Tryptone                              | 5                               | 5            |
|                                            | Peptone                               | 5                               | 5            |
|                                            | Yeast Extract                         | 4.5                             | 4.5          |
|                                            | Casein                                | 3                               | 3            |
| Salts                                      | NaCl                                  | 4.5                             | 4.5          |
|                                            | KCl                                   | 4.5                             | 4.5          |
|                                            | MgSO <sub>4</sub> · 7H <sub>2</sub> O | 1.25                            | 1.25         |
|                                            | CaCl <sub>2</sub>                     | 0.113                           | 0.113        |
|                                            | NaHCO <sub>3</sub>                    | 1.5                             | 1.5          |
|                                            | KH <sub>2</sub> PO <sub>4</sub>       | 0.5                             | 0.5          |
|                                            | L-Cysteine HCl                        | 0.8                             | 0.8          |
|                                            | FeSO <sub>4</sub> · 7H <sub>2</sub> O | 0.005                           | 0.005        |
|                                            | Bile salts (no 3)                     | 0.4                             | 0.4          |
| Mucin                                      | Porcine gastric mucin (type II)       | 4                               | 4            |
| Vitamin solution<br>(Gibson and Wang 1994) | Pantothenate                          | 10 mg/L                         | 10 mg/L      |
|                                            | Nicotinamide                          | 5 mg/L                          | 5 mg/L       |
|                                            | Thiamine                              | 4 mg/L                          | 4 mg/L       |
|                                            | Biotin                                | 2 mg/L                          | 2 mg/L       |
|                                            | B12                                   | 0.5 mg/L                        | 0.5 mg/L     |
|                                            | Menadione                             | 1 mg/L                          | 1 mg/L       |
|                                            | PABA                                  | 5 mg/L                          | 5 mg/L       |
|                                            | Hemin                                 | 10 mg/L                         | 10 mg/L      |
| Emulsifyer, Anti-foam                      | Anti-foam                             | 2.5 mL                          | 2.5 mL       |
|                                            | Tween 80                              | 1 mL                            | 1 mL         |

D

|                            | Chow      | EEN-like  |
|----------------------------|-----------|-----------|
| <b>Fiber [g/kg]</b>        | 170       | 50        |
| <b>Fiber Source</b>        | soy plant | cellulose |
| <b>Protein [E%]</b>        | 27        | 23        |
| <b>Carbohydrataes [E%]</b> | 61        | 64        |
| <b>Sucrose [g/kg]</b>      | 0         | 50        |
| <b>Fat [E%]</b>            | 12        | 13        |
| <b>kcal/kg</b>             | 3338      | 3660      |

926 **Supplementary Fig. 1: Composition of used diets and media in model systems**

927 **A, B:** Pie chart of gut chemostat medium composition. **A** FR medium. **B** EEN-like medium. **C** Composition of gut  
928 chemostat medium (g/L) of FR and EEN-like medium. **D** Composition of mouse diets (chow and EEN-like mouse  
929 diet) in Energy % (E%) or g/kg. EEN-like diet = SNIFF S5745-E90

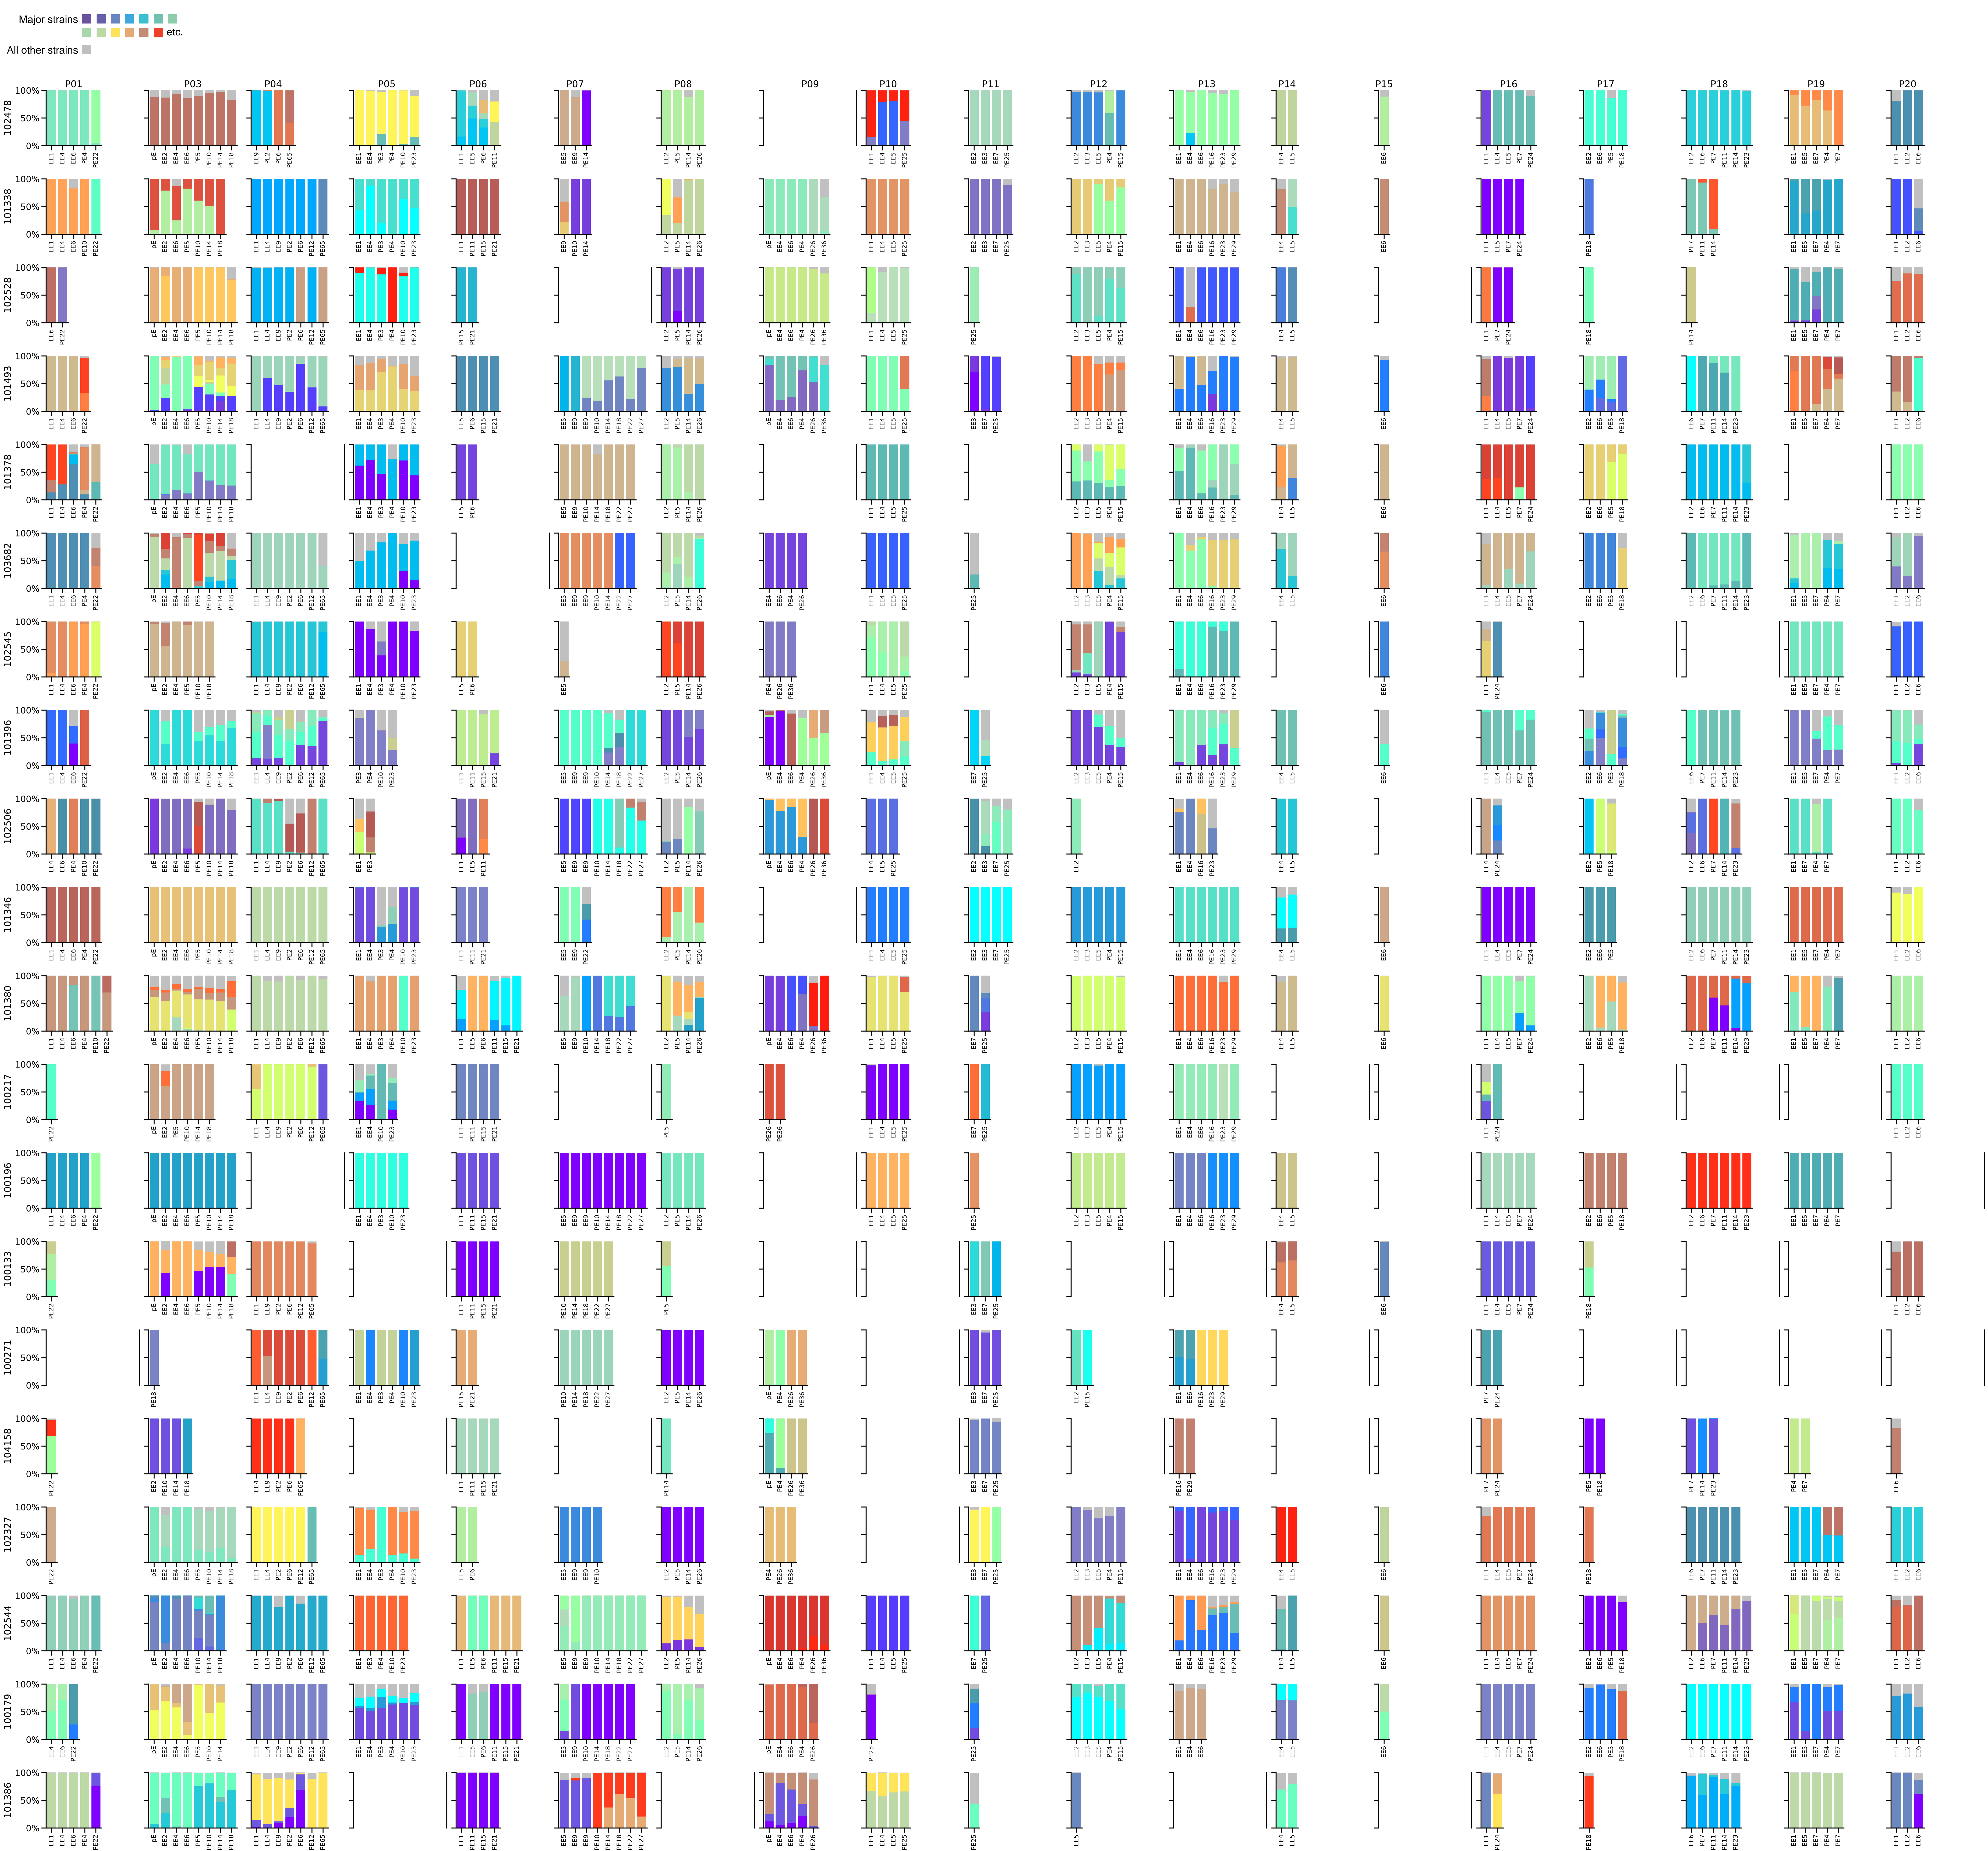

930 **Supplementary Fig. 2: Strain-level diversity within and between CD-EEN patients**

931 *Strain-level diversity in 19 CD-EEN patients (vertical) for 20 species (horizontal, Extended Data Table 2). Major*  
932 *strains are shown in colors, all other strains are grey. Empty plots = not detected.*
