# Supplementary material for: Exclusive Enteral Nutrition Initiates Individual Protective Microbiome Changes to Induce Remission in Pediatric Crohn’s Disease
Source: bioRxiv or medRxiv preprint supplement (doi:10.1101/2023.12.21.23300351), 2024-09-16
Supplement: Supplementary file [file media-2.pdf]

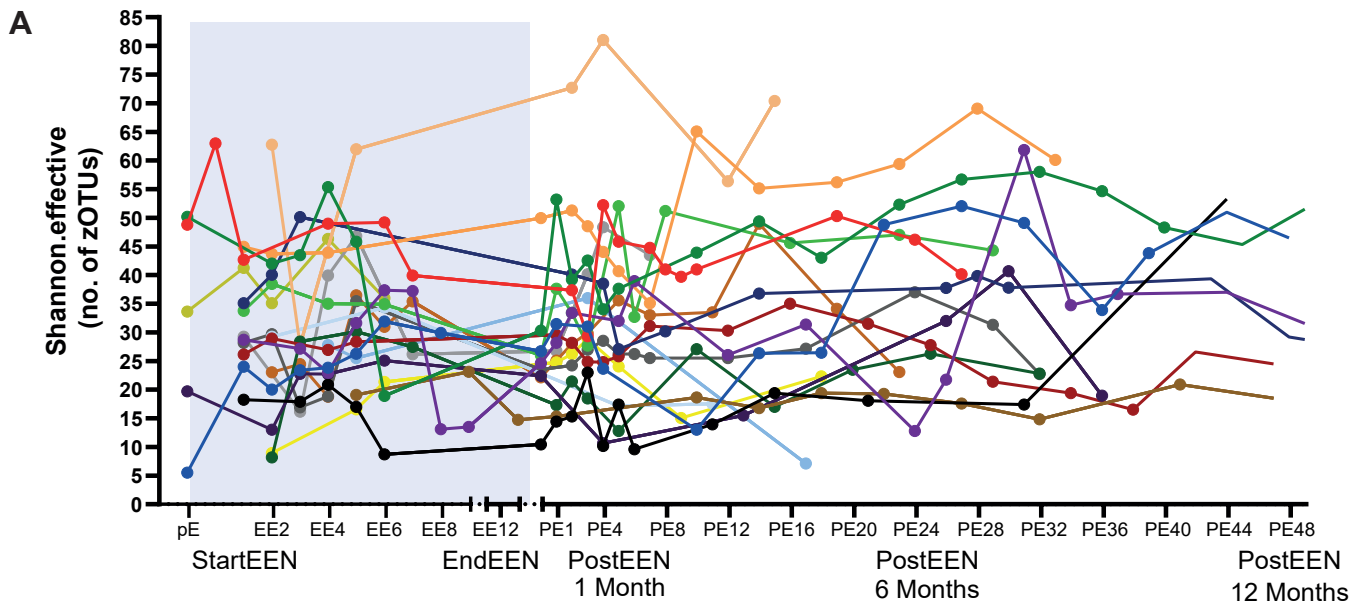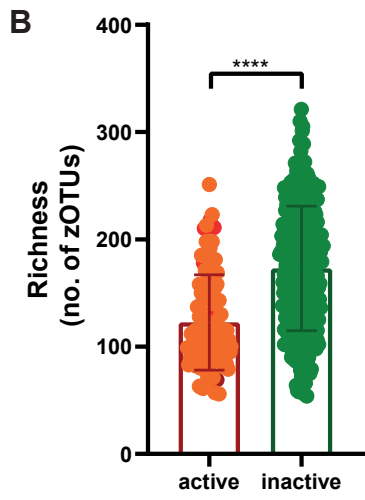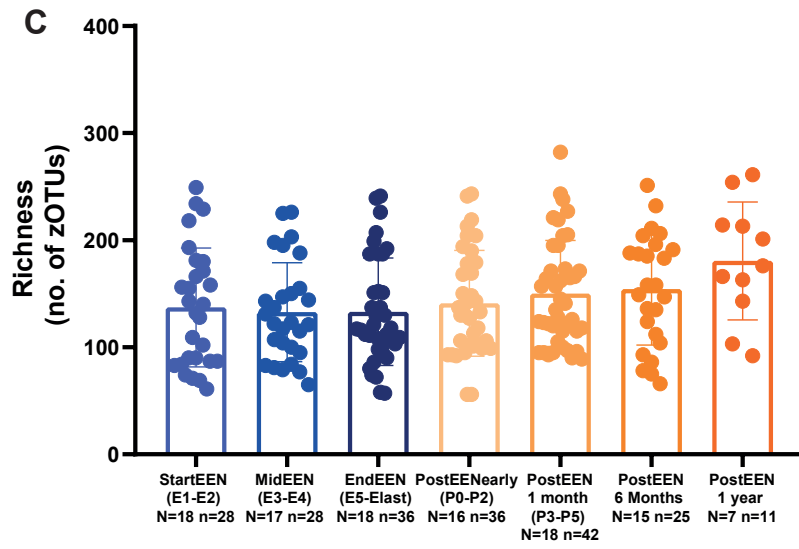

Extended Data Figure 1

890 **Extended Data Fig.1: Alpha-diversity in CD-EEN**

891 **A-C** Alpha-diversity plotted as Shannon effective number or Richness (number of zOTUs) for all samples from the  
892 20 newly diagnosed pCD patients undergoing EEN therapy. **A** Shannon effective number plotted per patient over  
893 time, patient colour code to be found in Fig 1. **B** Richness (number of zOTUs) in samples from patients in active or  
894 inactive disease based on pga (physician global assessment, active = severe, moderate, mild, remission =  
895 remission). **C** Richness (number of zOTUs) along EEN therapy in groups. pE = PreEEN, EE = EEN, PE = PostEEN.

## A Community 4

Associated to ■ EEN ■ PostEEN

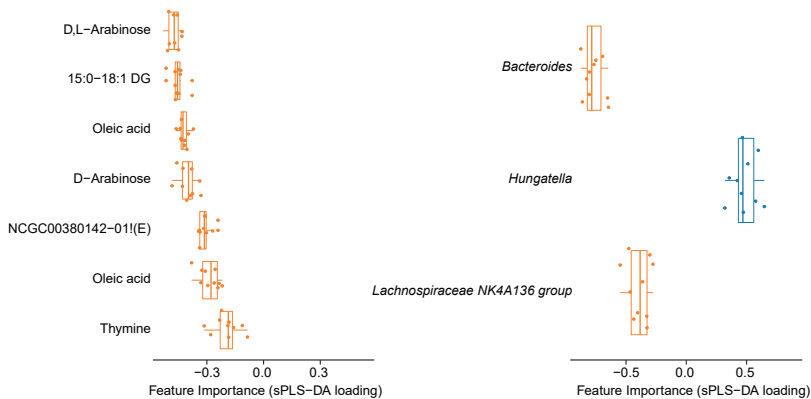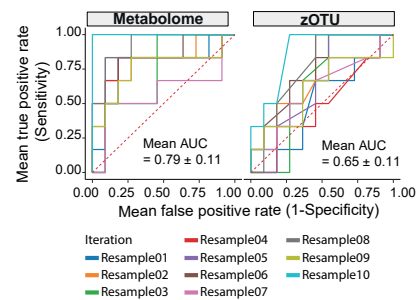

## B Community 5

Associated to ■ EEN ■ PostEEN

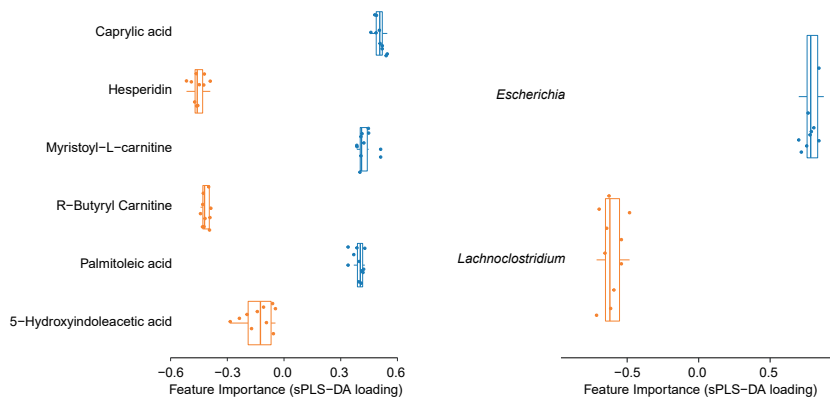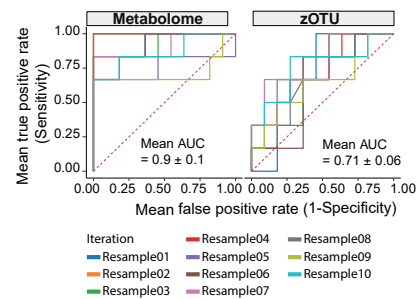

## C Features in Modulen IBD®

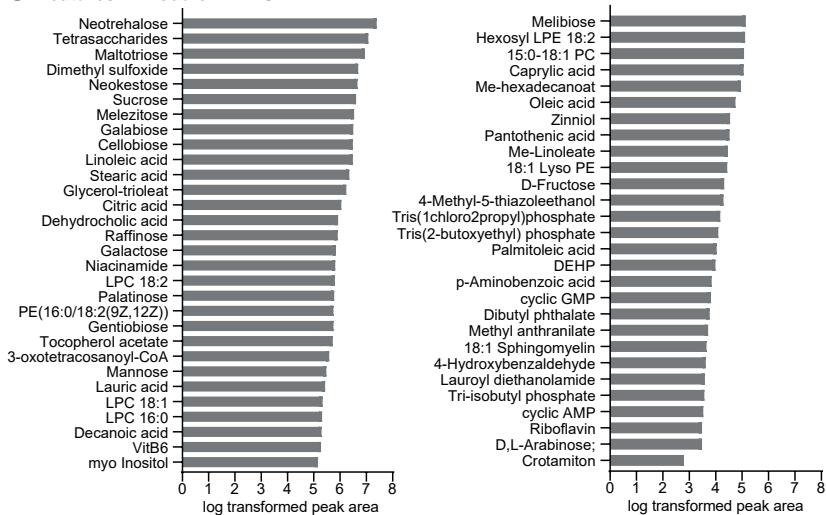

896 **Extended Data Fig.2: Data integration & identification of features of EEN:**

897 **A, B:** Community 4 and 5: Most important features (metabolites and zOTUs) for each community with feature  
898 importance to PostEEN (<0, orange) and EEN (>0, blue). One dot represents the loading of the respective feature  
899 for a single iteration of the cross-validation procedure (i.e. each iteration is trained on a (stratified) random subset  
900 of all data points). ROC-curve calculation with 10 single iterations for metabolome and zOTU features, respectively.

901 **C** Identified features of Modulen IBD® from untargeted metabolomic analyses.

## Extended Data Table 1

| species_id | zotu    | rank_product | corr | s_UHGG                                                | EzbioCloud ID                              | Association in Network |
|------------|---------|--------------|------|-------------------------------------------------------|--------------------------------------------|------------------------|
| 102478     | Zotu1   |              | 1    | 0.775323178 s__ <i>Bacteroides_B_dorei</i>            | <i>Phocaeicola vulgatus</i> (99.52%)       |                        |
| 100032     | Zotu10  |              | 1    | 0.977653818 s__ <i>Hungatella effluvii</i>            | <i>Blautia luti</i> (100%)                 | EEN                    |
| 100562     | Zotu106 |              | 1    | 0.935416045 s__ <i>Lachnospira</i> sp000437735        | <i>Lachnospira pectinoschiza</i> (100%)    |                        |
| 102478     | Zotu11  |              | 2    | 0.631435539 s__ <i>Bacteroides_B_dorei</i>            | <i>Phocaeicola vulgatus</i> (99.76%)       |                        |
| 101338     | Zotu13  |              | 2    | 0.624156446 s__ <i>Blautia_A_wexlerae</i>             | <i>Blautia luti</i> (100%)                 | PostEEN                |
| 101378     | Zotu14  |              | 1    | 0.869232432 s__ <i>Bacteroides ovatus</i>             | <i>Bacteroides ovatus</i> (100%)           |                        |
| 100032     | Zotu15  |              | 2    | 0.65510351 s__ <i>Hungatella effluvii</i>             | <i>Zhenhengia yiwuensis</i> (99.75%)       |                        |
| 101396     | Zotu15  |              | 2    | 0.770024076 s__ <i>Absiella innocuum</i>              | <i>Zhenhengia yiwuensis</i> (99.75%)       |                        |
| 102454     | Zotu18  |              | 1    | 0.91747804 s__ <i>Akkermansia muciniphila</i>         | <i>Akkermansia muciniphila</i> (100%)      |                        |
| 101302     | Zotu19  |              | 2    | 0.392193391 s__ <i>Alistipes putredinis</i>           | <i>Phocaeicola vulgatus</i> (99.29%)       |                        |
| 100196     | Zotu2   |              | 1    | 0.852046159 s__ <i>Bacteroides thetaiotaomicron</i>   | <i>Bacteroides thetaiotaomicron</i> (100%) |                        |
| 101374     | Zotu27  |              | 1    | 0.703733782 s__ <i>Faecalicatena torques</i>          | <i>Ruminococcus torques</i> (100%)         | EEN                    |
| 102293     | Zotu29  |              | 1    | 0.997297743 s__ <i>Prevotella copri</i>               | <i>Prevotella copri</i> (99.29%)           |                        |
| 100179     | Zotu31  |              | 1    | 0.779535274 s__                                       | <i>Enterocloster aldensis</i> (99.5%)      | EEN                    |
| 102369     | Zotu33  |              | 2    | 0.958081689 s__ <i>Clostridioides difficile</i>       | <i>Clostridioides difficile</i> (99.75)    |                        |
| 101396     | Zotu34  |              | 2    | 0.972906168 s__ <i>Absiella innocuum</i>              | <i>Clostridium innocuum</i> (100%)         | EEN                    |
| 100014     | Zotu36  |              | 1    | 0.933032786 s__ <i>Clostridium butyricum</i>          | <i>Clostridium butyricum</i> (98.01%)      |                        |
| 102506     | Zotu4   |              | 1    | 0.572645169 s__ <i>Escherichia coli_D</i>             | <i>Escherichia</i> sp. (100%)              | EEN                    |
| 101400     | Zotu46  |              | 1    | 0.931895179 s__ <i>Erysipelatoclostridium ramosum</i> | <i>Thomasclavelia ramosa</i> (99.77%)      | EEN                    |
| 101386     | Zotu5   |              | 1    | 0.729073964 s__ <i>Clostridium_M_clostridioforme</i>  | <i>Enterocloster bolteae</i> (100%)        | EEN                    |
| 101493     | Zotu5   |              | 2    | 0.720217644 s__ <i>Clostridium_M bolteae</i>          | <i>Enterocloster bolteae</i> (100%)        | EEN                    |
| 102293     | Zotu52  |              | 2    | 0.997604941 s__ <i>Prevotella copri</i>               | <i>Prevotella</i> sp. (99.05%)             |                        |
| 100074     | Zotu55  |              | 2    | 0.983086476 s__ <i>Alistipes onderdonkii</i>          | <i>Alistipes onderdonkii</i> (99.76%)      |                        |
| 101346     | Zotu6   |              | 2    | 0.442113407 s__ <i>Bacteroides uniformis</i>          | <i>Bacteroides uniformis</i> (99.76%)      |                        |
| 100243     | Zotu67  |              | 2    | 0.548704475 s__ <i>Bacteroides_B massiliensis</i>     | <i>Phocaeicola massiliensis</i> (99.53%)   |                        |
| 101380     | Zotu7   |              | 1    | 0.863046936 s__ <i>Faecalicatena gnavus</i>           | <i>Ruminococcus gnavus</i> (100%)          |                        |
| 101361     | Zotu95  |              | 2    | 0.748568683 s__ <i>Sutterella wadsworthensis_B</i>    | <i>Sutterella wadsworthensis</i> (100%)    |                        |

## Extended Data Table 2

| UHGG Species ID | ZOTU_match    | indicator_score | species_log2_old_change | species_overall_mean_relative_abundance | num_intra-subject_sample_pairs | mean_pairwise_braycurtis_dissimilarity | UHGG Taxonomy                              | EzbioCloud ID                                | Association in Network |
|-----------------|---------------|-----------------|-------------------------|-----------------------------------------|--------------------------------|----------------------------------------|--------------------------------------------|----------------------------------------------|------------------------|
| 102478          | Zotu1/ Zotu11 | 2.98            | -0.63                   | 0.11                                    | 149.00                         | 0.30                                   | s__ <i>Bacteroides_B_dorei</i>             | <i>Phocaeicola vulgatus</i> (99.52%/ 99.76%) |                        |
| 101338          | Zotu13        | 2.41            | 2.43                    | 0.02                                    | 146.00                         | 0.40                                   | s__ <i>Blautia_A_wexlerae</i>              | <i>Blautia luti</i> (100%)                   | PostEEN                |
| 102528          |               | 2.24            | 3.35                    | 0.01                                    | 123.00                         | 0.43                                   | s__ <i>Anaerostipes hadrus</i>             |                                              |                        |
| 101493          | Zotu5         | 2.10            | -1.51                   | 0.02                                    | 187.00                         | 0.49                                   | s__ <i>Clostridium_M bolteae</i>           | <i>Enterocloster bolteae</i> (100%)          | EEN                    |
| 101378          | Zotu14        | 1.98            | 1.68                    | 0.02                                    | 140.00                         | 0.35                                   | s__ <i>Bacteroides ovatus</i>              | <i>Bacteroides ovatus</i> (100%)             |                        |
| 103682          |               | 1.91            | -1.90                   | 0.01                                    | 176.00                         | 0.43                                   | s__ <i>Ruthenibacterium lactatiformans</i> |                                              |                        |
| 102545          |               | 1.77            | 2.17                    | 0.02                                    | 111.00                         | 0.39                                   | s__ <i>Faecalibacterium prausnitzii_G</i>  |                                              |                        |
| 101396          | Zotu34        | 1.72            | -2.46                   | 0.01                                    | 176.00                         | 0.46                                   | s__ <i>Absiella innocuum</i>               | <i>Clostridium innocuum</i> (100%)           | EEN                    |
| 102506          | Zotu4         | 1.43            | -0.90                   | 0.02                                    | 139.00                         | 0.64                                   | s__ <i>Escherichia coli_D</i>              | <i>Escherichia</i> sp. (100%)                | EEN                    |
| 101346          | Zotu6         | 0.99            | 1.25                    | 0.05                                    | 158.00                         | 0.11                                   | s__ <i>Bacteroides uniformis</i>           | <i>Bacteroides uniformis</i> (99.76%)        |                        |
| 101380          | Zotu7         | 0.76            | -0.39                   | 0.02                                    | 201.00                         | 0.44                                   | s__ <i>Faecalicatena gnavus</i>            | <i>Ruminococcus gnavus</i> (100%)            |                        |
| 100217          |               | 0.55            | 4.48                    | 0.00                                    | 80.00                          | 0.31                                   | s__ <i>Acetatifactor</i> sp900066565       |                                              |                        |
| 100196          | Zotu2         | 0.54            | 1.23                    | 0.04                                    | 154.00                         | 0.07                                   | s__ <i>Bacteroides thetaiotaomicron</i>    | <i>Bacteroides thetaiotaomicron</i> (100%)   |                        |
| 100133          |               | 0.43            | 4.61                    | 0.01                                    | 69.00                          | 0.21                                   | s__ <i>Blautia_A</i> sp000433815           |                                              |                        |
| 100271          |               | 0.41            | 4.58                    | 0.00                                    | 71.00                          | 0.38                                   | s__ <i>Roseburia inulinivorans</i>         |                                              |                        |
| 104158          |               | 0.39            | 8.11                    | 0.01                                    | 35.00                          | 0.23                                   | s__ <i>Dialister invisus</i>               |                                              |                        |
| 102327          |               | 0.38            | 3.83                    | 0.00                                    | 129.00                         | 0.18                                   | s__ <i>Oscillibacter</i> sp900066435       |                                              |                        |
| 102544          |               | 0.37            | -1.37                   | 0.00                                    | 192.00                         | 0.40                                   | s__ <i>Eggerthella lenta</i>               |                                              |                        |
| 100179          | Zotu31        | 0.34            | -0.92                   | 0.01                                    | 160.00                         | 0.29                                   | g__ <i>Clostridium_M</i>                   | <i>Enterocloster aldensis</i> (99.5%)        | EEN                    |
| 101386          | Zotu5         | 0.33            | -0.66                   | 0.01                                    | 123.00                         | 0.36                                   | s__ <i>Clostridium_M_clostridioforme</i>   | <i>Enterocloster bolteae</i> (100%)          | EEN                    |

902 ***Extended Data Table 1: Matching of metagenomic and 16S results***

903 *Identified candidate matches where species (based on ubiquitous marker genes) and zOTU relative abundance*  
904 *profiles were highly correlated across samples. 27 zOTUs were matched to one or more metagenomic species,*  
905 *accounting for a median of 40% of relative abundance per sample.*

906 ***Extended Data Table 2: Identification of species with extensive strain turnover, large changes in relative***  
907 ***abundance at the end of EEN, high mean relative abundance, and high prevalence***

908 *zOTUs were re-checked using the 16S-based ID tool of EzBioCloud<sup>64</sup> using the database update 2023.08.23,*  
909 *reflecting all taxa published and accepted by IJSEM until April 2023. Indicator\_score was calculated as =*  
910 *|species\_log2\_fold\_change|\* species\_overall\_mean\_relative\_abundance\* num\_intrasubject\_sample\_pairs \**  
911 *mean\_pairwise\_braycurtis\_dissimilarity*

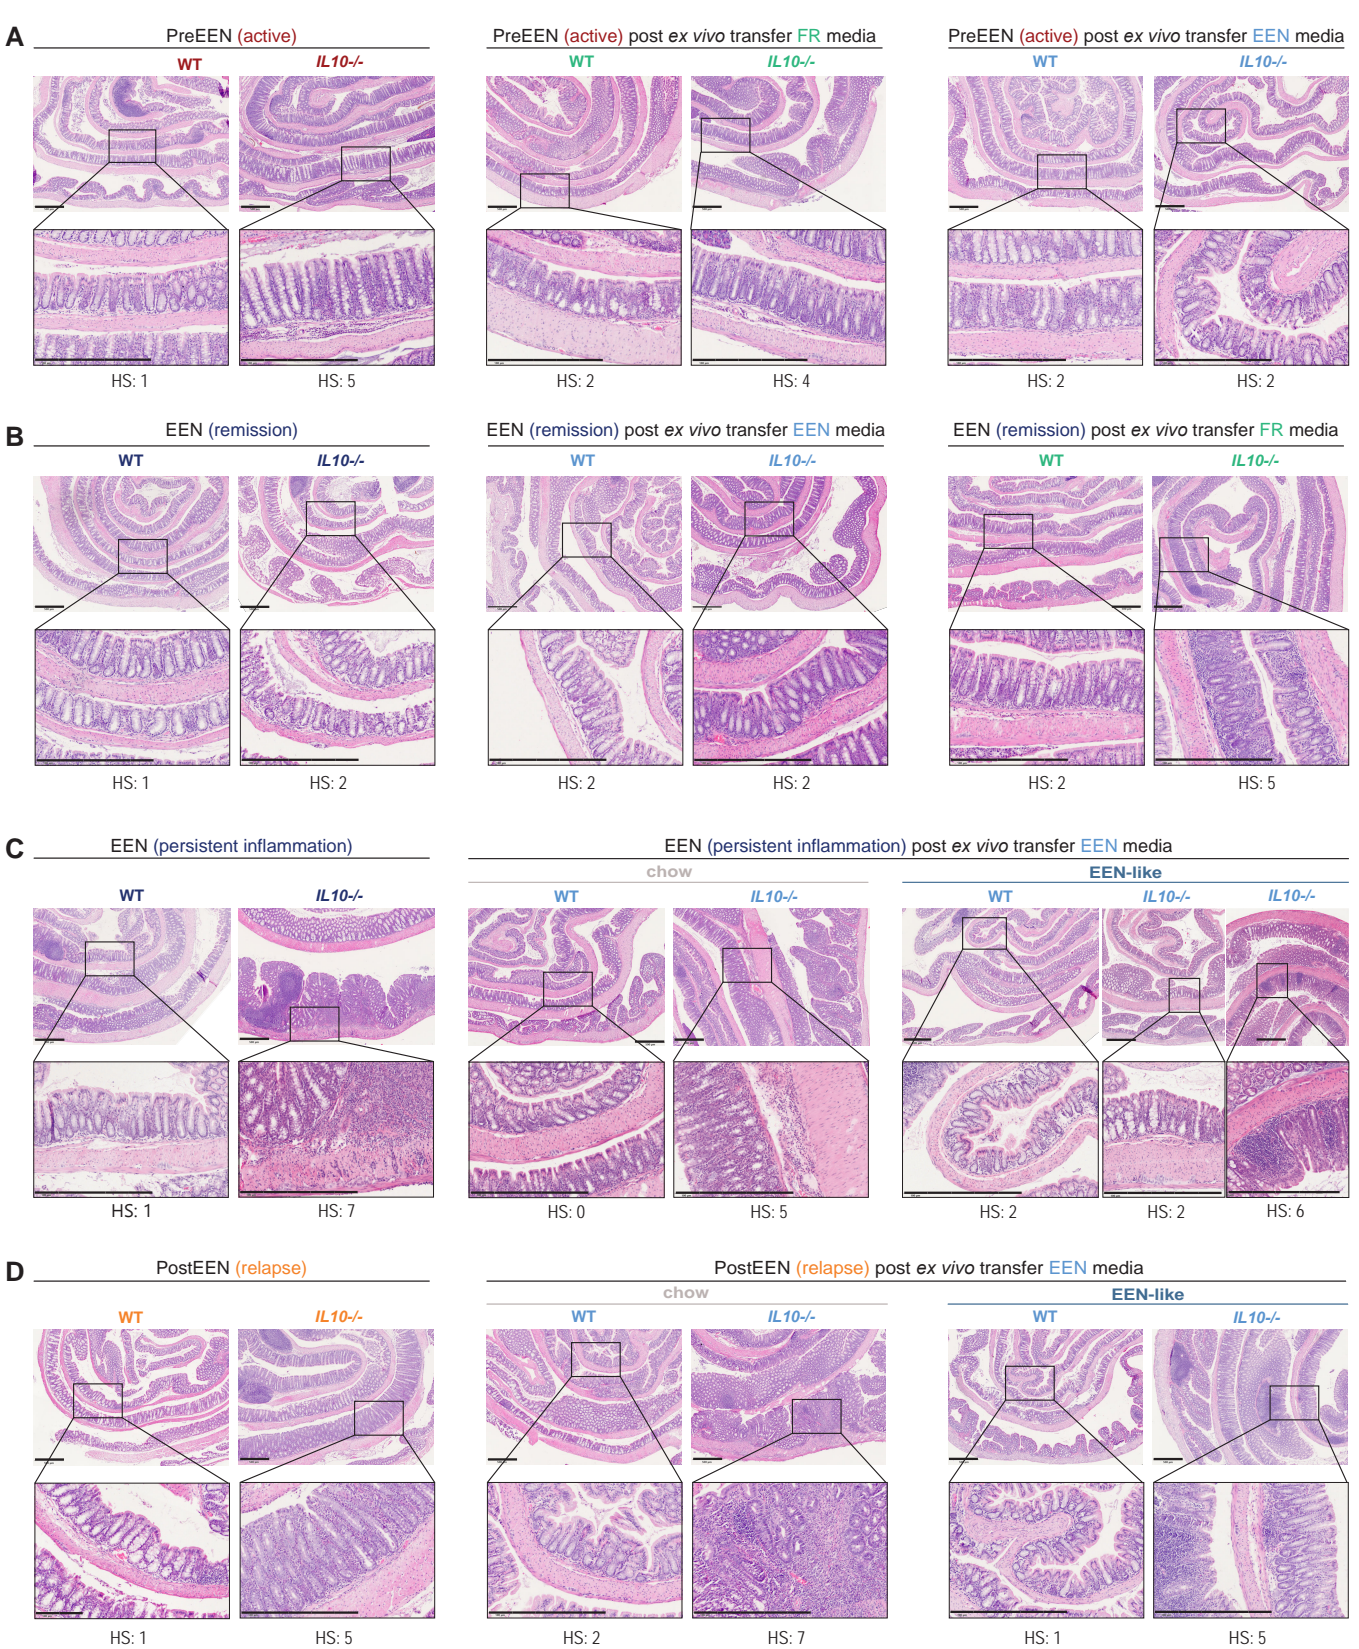

**Extended Data Figure 3**



912 **Extended Data Fig.3: Histopathology of mouse transfers:**

913 **A-D:** Mouse transfer experiments: Representative (mean of group) H&E stained sections of colonic Swiss roles and  
914 corresponding higher magnifications for IL10<sup>-/-</sup> mice and respective controls (scale bars = 500 μM, HS =  
915 histopathology score).

**A** Mouse colonization: EEN (persistent inflammation) post ex vivo EEN-like media

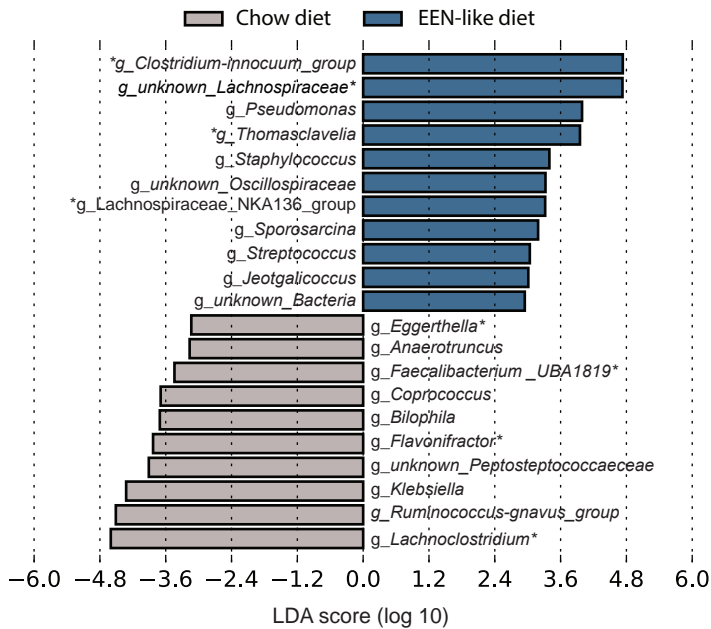

**B** Mouse colonization: PostEEN (relapse) post ex vivo EEN-like media

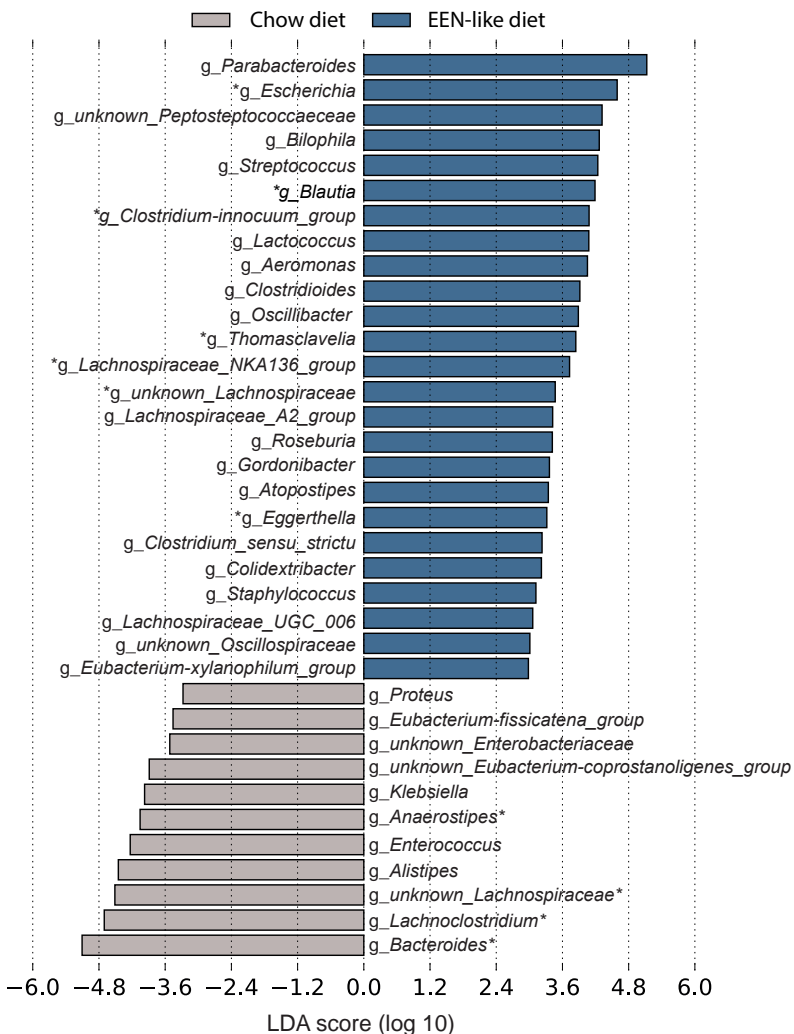

916 **Extended Data Fig.4: Differential abundant bacteria in EEN-like vs chow fed mice:**

917 **A** LEfSe (Linear discriminant analysis Effect Size) of differentially abundant bacteria at genus level in the post ex  
918 vivo recipient mice of fermented EEN (persistent inflammation) fecal sample under EEN-like medium (mouse  
919 colonization: Chow diet = mice received EEN (persistent inflammation) sample fermented under EEN medium on  
920 chow diet; EEN-like diet = mice received EEN (persistent inflammation) and sample fermented under EEN medium  
921 on EEN-like mouse diet. **B** LEfSe of differentially abundant bacteria at genus level in the post ex vivo recipient mice  
922 of fermented PostEEN (relapse) and fecal sample under EEN-like medium (mouse colonization: Chow diet = mice  
923 received PostEEN (relapse) sample fermented under EEN medium on chow diet; EEN-like diet = mice received  
924 PostEEN (relapse) sample fermented under EEN medium on EEN-like mouse diet. \* Indicates genera identified in  
925 data integration network analyses (based on zOTUs).
